# Supplementary material for: Microfluidic particle zipper enables controlled loading of droplets with distinct particle types
Source: Royal Society of Chemistry journal article supplement (doi:10.1039/d0lc00339e), 2020-01-01
Supplement: d0lc00339e4.pdf [file d0lc00339e4.pdf]

Sheet1

Sequencing primers

P5 PE2c.1 AATGATACGGCGACCACCGAGATCTACAC-[i5]-TTGTCCAAAATGCCGATTCCTGCTGAAC  
P7 rv const CAAGCAGAAGACGGCATAACGAGAT-[i7]-GTCTCGTGGGCTCGGAGATGTGTATAAGAGACAG  
Custom Read 1 TTGTCCAAAATGCCGATTCCTGCTGAACGTCA

Genomic forward primers (on bead)

EZH2\_1 AAATGCCGATTCCTGCTGAAC [barcode] TGCAAATTCAGAAATTTCAAACCTGCATGT  
FLT3\_1 AAATGCCGATTCCTGCTGAAC [barcode] GCAGACTGCTGTGAGGGTTTTT  
FLT3\_3 AAATGCCGATTCCTGCTGAAC [barcode] GAGTGCTCAGTGTCTAATTCCACTT  
KIT\_1 AAATGCCGATTCCTGCTGAAC [barcode] CTAAAATGTGTGATATCCCTAGACAGGATT  
KRAS\_1 AAATGCCGATTCCTGCTGAAC [barcode] AAAGGTGAGTTTGTATTAAGGTTACTGGT  
NPM1\_1\_2 AAATGCCGATTCCTGCTGAAC [barcode] TTCTTGGAGTCATATCTTTATCTAGAGT  
TP53\_1 AAATGCCGATTCCTGCTGAAC [barcode] GGGTTATAGGGAGGTCAAATAAGCA  
TP53\_2 AAATGCCGATTCCTGCTGAAC [barcode] TGTGATGAGAGGTGGATGGGTA  
TP53\_3 AAATGCCGATTCCTGCTGAAC [barcode] TGCCGTCTTCCAGTTGCTTTAT  
WT1\_3 AAATGCCGATTCCTGCTGAAC [barcode] GCCTGAAAAGGAGCTCTTGAA  
chr10\_5554293 AAATGCCGATTCCTGCTGAAC [barcode] CCCTAACCATCGTTCCTTCAGG  
chr16\_55770629 AAATGCCGATTCCTGCTGAAC [barcode] TCCAGTGCTCCCAGGCAT  
chr16\_8569820 AAATGCCGATTCCTGCTGAAC [barcode] ATTTTCATGACCACTCTATTTCTTTCT  
chr18\_9750662 AAATGCCGATTCCTGCTGAAC [barcode] CGGATTGGCCAGTGCATTC  
Chr6\_17076840 AAATGCCGATTCCTGCTGAAC [barcode] TGAACCTAGGAGGCTGAGGT  
chr6\_62094287 AAATGCCGATTCCTGCTGAAC [barcode] GTTAGCCATTCTCTCTAGTGCC

Genomic reverse primers

EZH2\_1 rv GTCTCGTGGGCTCGGAGATGTGTATAAGAGACAG CATTTTAATGCACCCACTATCTTCAGC  
FLT3\_1 rv GTCTCGTGGGCTCGGAGATGTGTATAAGAGACAG CTCTGGTGTCTTCTTGACAGTGT  
FLT3\_3 rv GTCTCGTGGGCTCGGAGATGTGTATAAGAGACAG ACAGAAAAAGCAGACAGCTCTGAAA  
KIT\_1 rv GTCTCGTGGGCTCGGAGATGTGTATAAGAGACAG AAATGGTTTTCTTTCTCTCCAACCTA  
KRAS\_1 rv GTCTCGTGGGCTCGGAGATGTGTATAAGAGACAG AAAGAATGGTCTGCACCAGTAA  
NPM1\_1\_2 rv GTCTCGTGGGCTCGGAGATGTGTATAAGAGACAG TCTGCATTATAAAAAGGACAGCC  
TP53\_1 rv GTCTCGTGGGCTCGGAGATGTGTATAAGAGACAG GGCCTCTGATTCTCACTGATTG  
TP53\_2 rv GTCTCGTGGGCTCGGAGATGTGTATAAGAGACAG CCTCATCTTGGGCCTGTGTTAT  
TP53\_3 rv GTCTCGTGGGCTCGGAGATGTGTATAAGAGACAG CTGCTCACCATCGCTATCTGAG  
WT1\_3 rv GTCTCGTGGGCTCGGAGATGTGTATAAGAGACAG TCAAGACCTACGTGAATGTTACATG  
chr10\_5554293 rv GTCTCGTGGGCTCGGAGATGTGTATAAGAGACAG GAAACGGGGTGTGCGAA  
chr16\_55770629 rv GTCTCGTGGGCTCGGAGATGTGTATAAGAGACAG GTGGTGAGGAGATCAGGAGGAT  
chr16\_8569820 rv GTCTCGTGGGCTCGGAGATGTGTATAAGAGACAG CATGGACATGGCCTGCAC  
chr18\_9750662 rv GTCTCGTGGGCTCGGAGATGTGTATAAGAGACAG TCAGATGAACCAAAGGAAGTATGT  
chr6\_17076840 rv GTCTCGTGGGCTCGGAGATGTGTATAAGAGACAG AGATTCTGGTACATTGTCTTTATTCT  
chr6\_62094287 rv GTCTCGTGGGCTCGGAGATGTGTATAAGAGACAG TCTGCAACTCTACTGATAGTATG
